# Supplementary material
Source: publisher figshare collection journal article supplement (https://acs.figshare.com/ndownloader/files/23758995)
Supplement: Supplementary file 1 [file 23758995]

# Supporting Information

## Mechanism for Transition of Reverse Cylindrical Micelles to Spherical Micelles Induced by Diverse Alcohols

Hwa-Jin Lee,<sup>a,†</sup> Hyun-Jin Kim,<sup>a,†</sup> Da-Gyun Park,<sup>a</sup> Kyeong Sik Jin,<sup>b</sup> Ji Woong Chang,<sup>a,\*</sup> and Hee-Young Lee,<sup>a,\*</sup>

<sup>a</sup>Department of Chemical Engineering, The Kumoh National Institute of Technology, 61, Daehak-ro, Gumi-si, Gyeongsangbuk-do, 39177, Republic of Korea

<sup>b</sup>Pohang Accelerator Laboratory, Pohang University of Science and Technology, 80 Jigokro-127-beongil, Nam-Gu, Pohang, Kyungbuk 37673, Republic of Korea

### Corresponding Authors

Ji Woong Chang - Department of Chemical Engineering, The Kumoh National Institute of Technology, 61, Daehak-ro, Gumi-si, Gyeongsangbuk-do, 39177, Republic of Korea

Email: [jwchang@kumoh.ac.kr](mailto:jwchang@kumoh.ac.kr)

Hee-Young Lee - Department of Chemical Engineering, The Kumoh National Institute of Technology, 61, Daehak-ro, Gumi-si, Gyeongsangbuk-do, 39177, Republic of Korea

Email: [lhysshr@kumoh.ac.kr](mailto:lhysshr@kumoh.ac.kr)

Number of pages: 6

Number of figures: 5

### Contents

|                                                                                                             |    |
|-------------------------------------------------------------------------------------------------------------|----|
| Zero-shear viscosity of the lecithin/CaCl <sub>2</sub> solutions in decane .....                            | S2 |
| Steady-shear rheology of lecithin/CaCl <sub>2</sub> gel with various alcohols.....                          | S3 |
| FT-IR measurements of the lecithin/CaCl <sub>2</sub> gels containing various concentration of propanol..... | S4 |
| FT-IR measurements of the lecithin/CaCl <sub>2</sub> gels containing various concentration of pentanol..... | S5 |
| FT-IR measurements of the lecithin/CaCl <sub>2</sub> gels containing various concentration of octanol.....  | S6 |

1. Zero-shear viscosity of the lecithin/CaCl<sub>2</sub> solutions in decane

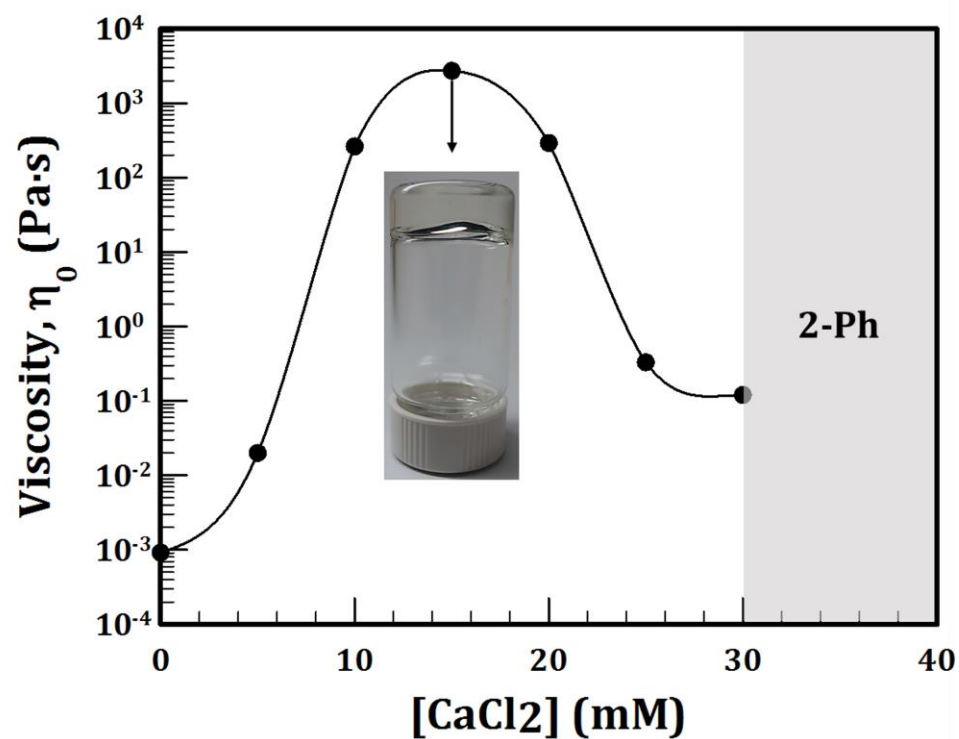

**Figure S1.** Zero-shear viscosity ( $\eta_0$ ) of the lecithin/CaCl<sub>2</sub> solutions in decane. The solution consists of 40 mM lecithin and varying concentrations of CaCl<sub>2</sub>. At 15 mM CaCl<sub>2</sub>, the viscosity is at its maximum and the sample has gel-like properties. Phase separation occurs at CaCl<sub>2</sub> concentrations >30 mM.

## 2. Steady-shear rheology of lecithin/CaCl<sub>2</sub> gel with various alcohols

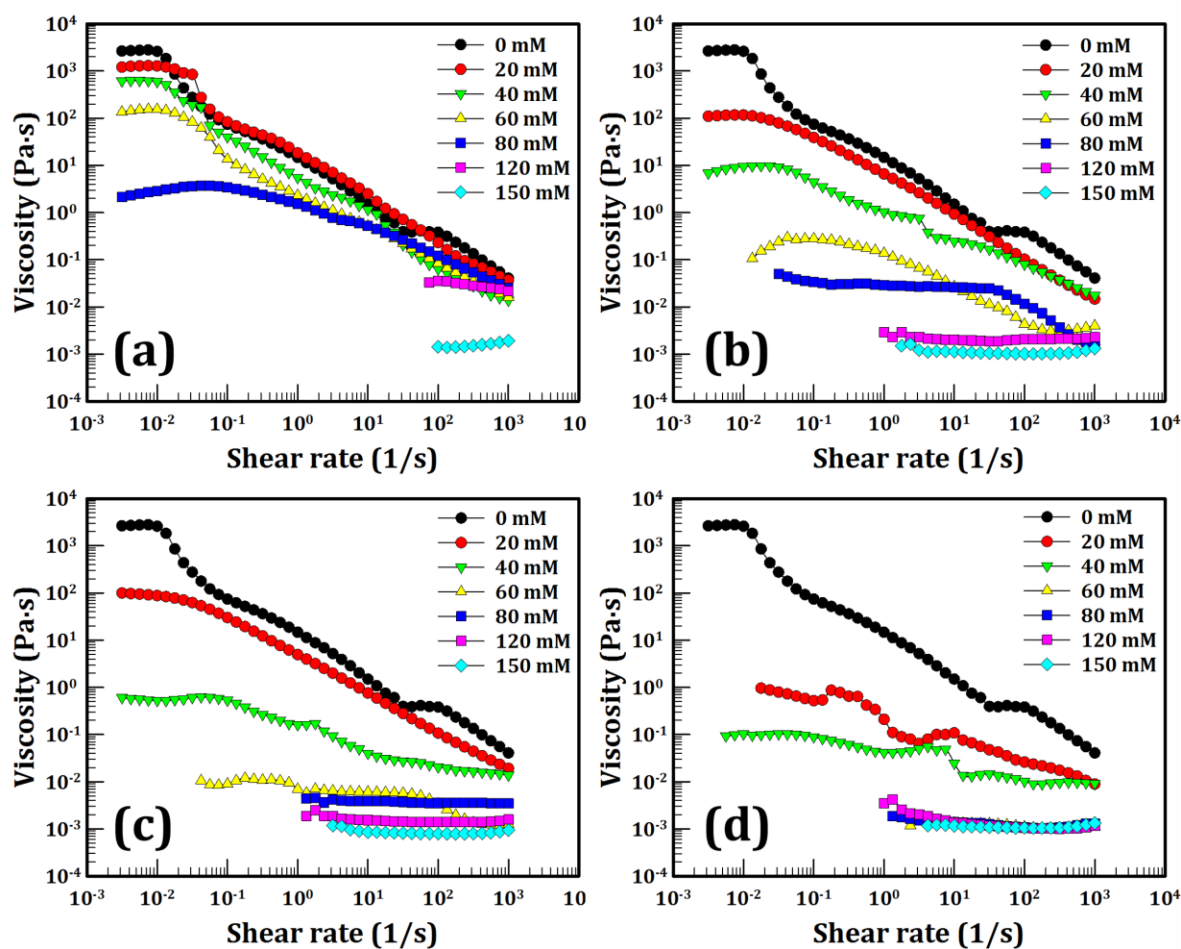

**Figure S2.** Steady-shear rheology of lecithin/CaCl<sub>2</sub> gel containing (a) propanol, (b) pentanol, (c) hexanol, and (d) octanol.

3. FT-IR measurements of the lecithin/ $\text{CaCl}_2$  gels containing various concentration of propanol

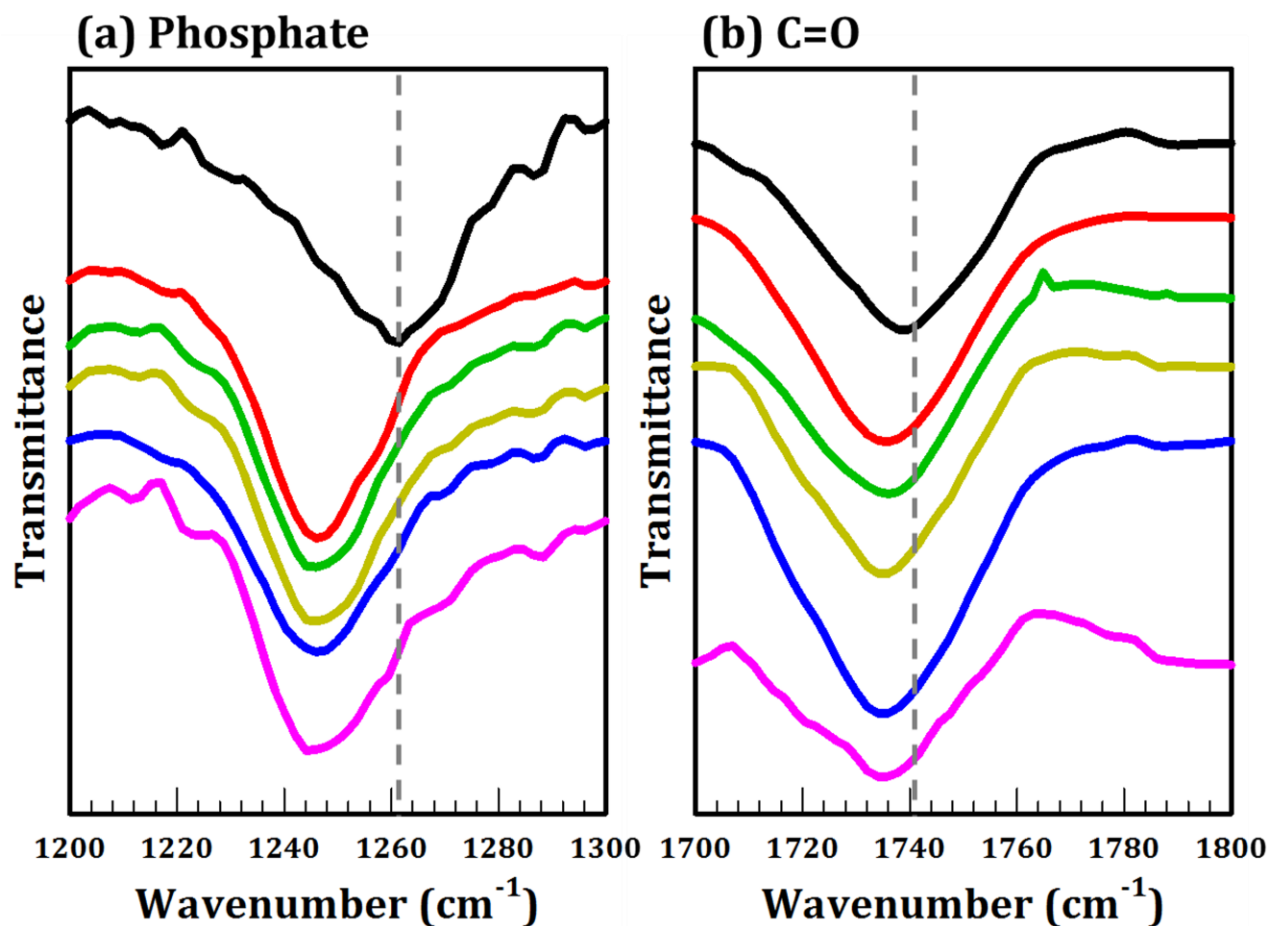

**Figure S3.** FT-IR absorption bands corresponding to (a) phosphate and (b) C=O observed for the lecithin/ $\text{CaCl}_2$  gels containing propanol (lecithin (—), lecithin/ $\text{CaCl}_2$  (—), lecithin/ $\text{CaCl}_2$ /propanol 20 mM (—), lecithin/ $\text{CaCl}_2$ /propanol 60 mM (—), lecithin/ $\text{CaCl}_2$ /propanol 120 mM (—) and lecithin/ $\text{CaCl}_2$ /propanol 150 mM (—)). The sample concentration was 100 mM lecithin and 37.5 mM  $\text{CaCl}_2$  in decane.

4. FT-IR measurements of the lecithin/CaCl<sub>2</sub> gels containing various concentration of pentanol

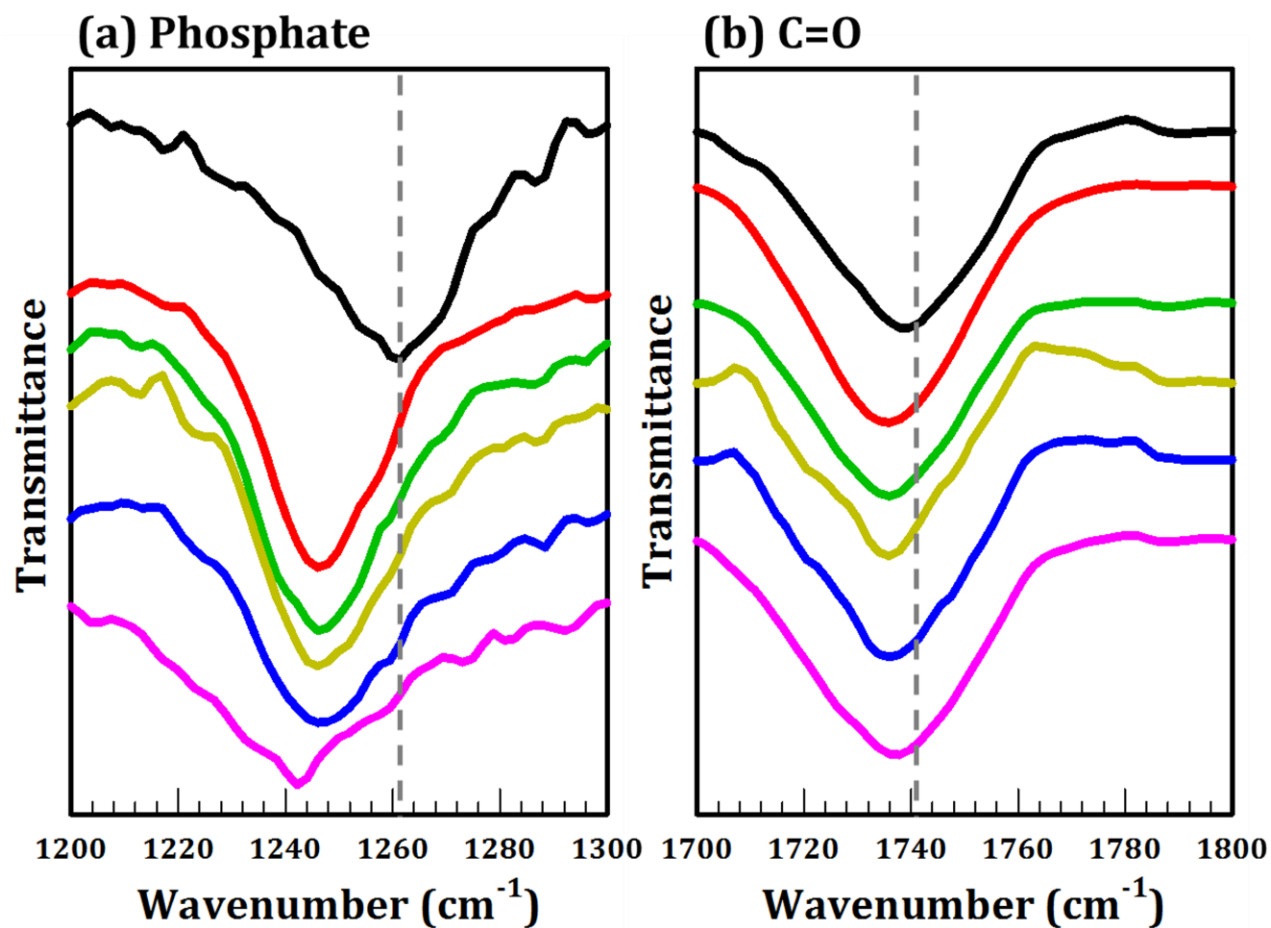

**Figure S4.** FT-IR absorption bands corresponding to (a) phosphate and (b) C=O observed for the lecithin/CaCl<sub>2</sub> gels containing pentanol (lecithin (—), lecithin/CaCl<sub>2</sub> (—), lecithin/CaCl<sub>2</sub>/pentanol 20 mM (—), lecithin/CaCl<sub>2</sub>/pentanol 60 mM (—), lecithin/CaCl<sub>2</sub>/pentanol 120 mM (—) and lecithin/CaCl<sub>2</sub>/pentanol 150 mM (—)). The sample concentration was 100 mM lecithin and 37.5 mM CaCl<sub>2</sub> in decane.

5. FT-IR measurements of the lecithin/CaCl<sub>2</sub> gels containing various concentration of octanol

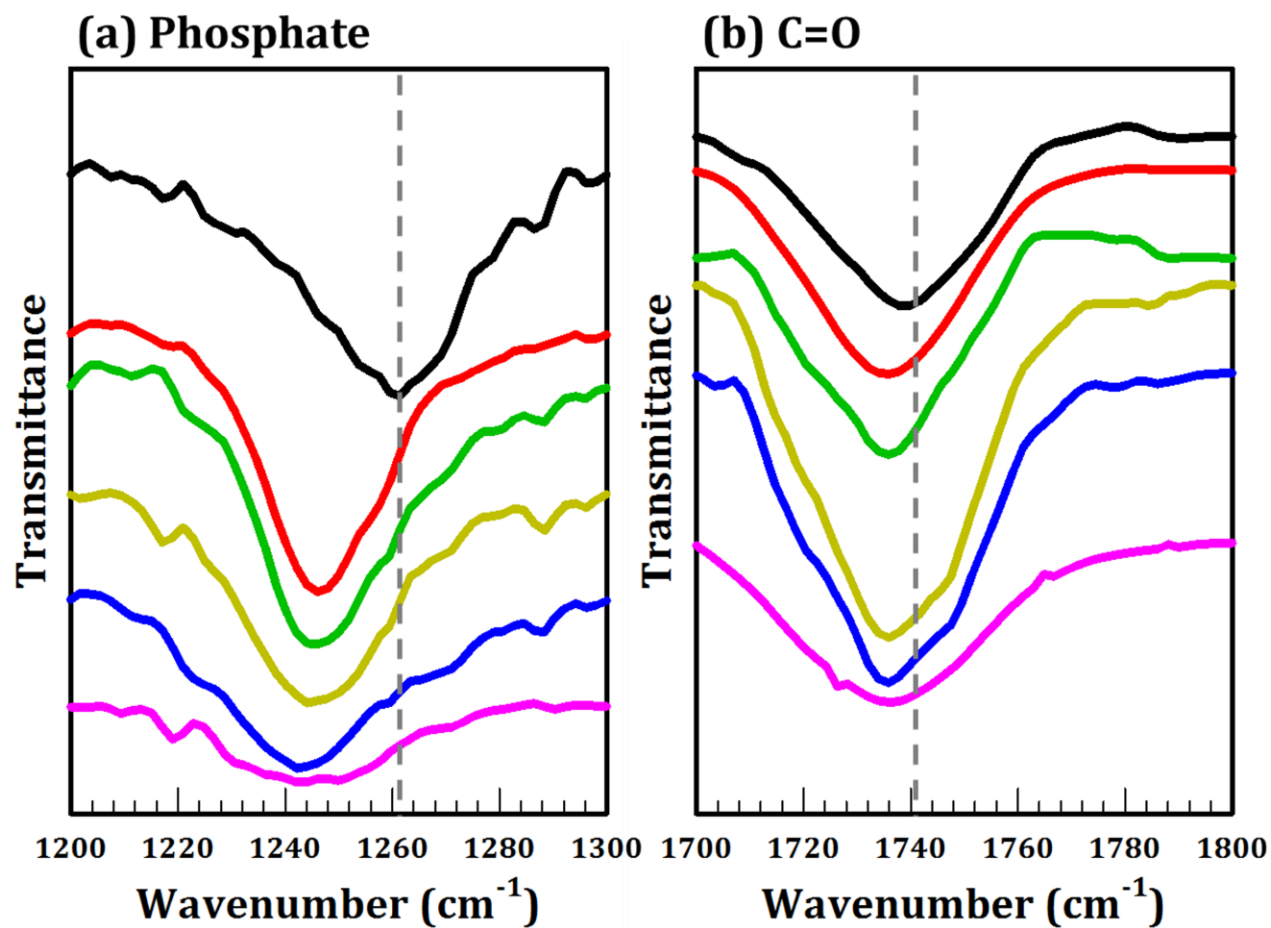

**Figure S5.** FT-IR absorption bands corresponding to (a) phosphate and (b) C=O observed for the lecithin/CaCl<sub>2</sub> gels containing octanol (lecithin (—), lecithin/CaCl<sub>2</sub> (—), lecithin/CaCl<sub>2</sub>/octanol 20 mM (—), lecithin/CaCl<sub>2</sub>/octanol 60 mM (—), lecithin/CaCl<sub>2</sub>/octanol 120 mM (—) and lecithin/CaCl<sub>2</sub>/octanol 150 mM (—)). The sample concentration was 100 mM lecithin and 37.5 mM CaCl<sub>2</sub> in decane.
